# Supplementary material
Source: PubMed Central journal article supplement (PMC10157506)
Supplement: jamacardiol-e230845-s002.pdf [file jamacardiol-e230845-s002.pdf]

## Supplemental Online Content

Frimodt-Møller EK, Vittinghoff E, Kaur G, Biering-Sørensen T, Soliman EZ, Marcus GM. Association between intensive vs standard blood pressure control and incident left ventricular conduction disease: a post hoc analysis of the SPRINT randomized clinical trial. *JAMA Cardiol*. Published online May 3, 2023.  
doi:10.1001/jamacardio.2023.0845

**eMethods.** Definition of comorbidities

**eTable 1.** Electrocardiographic Findings by Minnesota codes

**eTable 2.** Type of Incident Left-Ventricular Conduction Disease First Detected According to Randomization Assignment Group

**eTable 3.** Risk of Left-Ventricular Conduction Disease or Incident Ventricular Pacing in the Intensive Treatment Group Compared with the Standard Treatment Group

**eTable 4.** Risk of Left-Ventricular Conduction Disease in the Intensive Treatment Group Compared with Standard Treatment Group when Adjusting for Time-Updated Myocardial Infarction and Congestive Heart Failure

**eTable 5.** Competing Risk Regression with All-Cause Death as a Competing Risk

**eTable 6.** Baseline Characteristics Associated with Incident Left Ventricular Conduction Disease in Unadjusted Models

**eFigure 1.** Study Population

**eFigure 2.** Interaction Analyses

**eFigure 3.** Blood Pressure Control Group and Baseline Characteristics Associated with Incident Left-Ventricular Conduction Disease After Multivariable Adjustment

This supplemental material has been provided by the authors to give readers additional information about their work.

30 **Supplemental Methods**

31 Definition of comorbidities

32 Clinical or subclinical cardiovascular disease included one or more of the following: (a) previous  
33 myocardial infarction, percutaneous coronary intervention, coronary artery bypass grafting, carotid  
34 endarterectomy, carotid stenting, (b) peripheral artery disease with revascularization, (c) acute  
35 coronary syndrome with or without resting ECG changes, ECG changes on a graded exercise test,  
36 or positive cardiac imaging study, (d) at least a 50% diameter stenosis of a coronary, carotid, or  
37 lower extremity artery, (e) abdominal aortic aneurysm  $\geq 5$  cm with or without repair, (f) coronary  
38 artery calcium score  $\geq 400$  Agatston units within the past 2 years, (g) ankle branchial index  $\leq 0.9$   
39 within the past 2 years, or (h) left ventricular hypertrophy by ECG, echocardiogram report, or other  
40 cardiac imaging procedure report within the past 2 years. Atrial fibrillation was defined by its  
41 presence on baseline ECG or self-reported. History of congestive heart failure was self-reported.

42

43 Adjudication of incident myocardial infarction and heart failure (referred in the context as  
44 congestive heart failure, or CHF) for time-updated sensitivity analyses:

45 Myocardial infarction (MI), defined as the death of part of the myocardium due to an occlusion of a  
46 coronary artery from any cause, including spasm, embolus, thrombus or rupture of a  
47 plaque. SPRINT used standard case definitions for both fatal and nonfatal MI based  
48 on the combination of symptoms, elevation in biomarkers, and/or ECG findings. The  
49 algorithm for classifying MI includes elements of the clinical presentation (signs and  
50 symptoms), results of cardiac biomarker determinations, and ECG readings. The definition  
51 includes MI that occurred during surgery/procedure and MI aborted by thrombolytic  
52 therapy or procedure. SPRINT adjudicators were guided by specific, pre-specified

53 definitions and operational rules. MI was ascertained both from adjudication of hospital records for  
54 clinical events and also from the finding of new significant Q waves from the standardized  
55 interpretation of the study visit-obtained ECG (silent or unrecognized MI).

56 Heart Failure (HF) was defined as hospitalization, or emergency department visit requiring  
57 treatment with infusion therapy for a clinical syndrome that presents with multiple signs and  
58 symptoms consistent with cardiac decompensation/inadequate cardiac pump function.

59 Adjudication will use the ARIC study adjudication system (Rosamond and others, 2009).

60 The SPRINT HF outcome included definite or possible acute decompensation,

61 The identification and classification of HF cases relied on multiple pieces of key clinical data as  
62 well as adjudicators' clinical judgment, guided by specific, pre-specified definitions and operational  
63 rules. For participants with advanced CKD with or without chronic dialysis, the ascertainment  
64 of HF can be particularly difficult, since the fluid overload can be purely the consequence  
65 of fluid retention by the kidney or absence of kidneys. Under these circumstances, the  
66 adjudicators used their best judgment, utilizing all available information.

67 **eTable 1. Electrocardiographic Findings by Minnesota codes**

| Electrocardiographic finding      | Minnesota code                                                                                                                                                                                                                             |
|-----------------------------------|--------------------------------------------------------------------------------------------------------------------------------------------------------------------------------------------------------------------------------------------|
| Left anterior fascicular block    | 7-7                                                                                                                                                                                                                                        |
| Left bundle branch block          | 7-1-1, 7-1-2                                                                                                                                                                                                                               |
| Intraventricular conduction delay | 7-4                                                                                                                                                                                                                                        |
| Right bundle branch block         | 7-2-1, 7-2-2                                                                                                                                                                                                                               |
| Ventricular pacemaker             | 6-8                                                                                                                                                                                                                                        |
| Ventricular pre-excitation        | 6-4-1, 6-4-2                                                                                                                                                                                                                               |
| Left posterior fascicular block*  | QRS axis between 90° and 180° and a QRS duration of less than 0.12 seconds in the absence of right ventricular hypertrophy, lateral myocardial infarction, ventricular pre-excitation, left bundle branch block, and pacemaker on the ECG. |

68

69 \*As left posterior fascicular block (LPFB) was not part of the Minnesota classification, the presence  
 70 of LPFB was defined in accordance with previous literature.

71

72

73 **eTable 2. Type of Incident Left-Ventricular Conduction Disease First Detected According to**  
 74 **Randomization Assignment Group**

| <b>Type of first incident left ventricular conduction disease</b> | <b>Standard treatment<br/>N=3,918</b> | <b>Intensive treatment<br/>N=3,956</b> |
|-------------------------------------------------------------------|---------------------------------------|----------------------------------------|
| Left anterior fascicular block                                    | 34                                    | 30                                     |
| Left posterior fascicular block                                   | 1                                     | 0                                      |
| Left bundle branch block                                          | 32                                    | 25                                     |
| Intraventricular conduction delay                                 | 49                                    | 32                                     |

75

76

77 **eTable 3. Risk of Left-Ventricular Conduction Disease or Incident Ventricular Pacing in the**  
 78 **Intensive Treatment Group Compared with the Standard Treatment Group**

| <b>Outcome</b>                                                       | <b>Number of events</b> | <b>Model</b> | <b>Hazard ratio (95% CI)</b> | <b>P value</b> |
|----------------------------------------------------------------------|-------------------------|--------------|------------------------------|----------------|
| <b>Left-ventricular conduction disease or new ventricular pacing</b> | 275                     | Unadjusted   | 0.79 (0.62-0.99)             | 0.047          |
|                                                                      |                         | Adjusted     | 0.77 (0.60-0.98)             | 0.031          |

79 Adjusted models included age, sex, race, clinical or subclinical cardiovascular disease, congestive  
 80 heart failure, and chronic kidney disease.

81

82 **eTable 4. Risk of Left-Ventricular Conduction Disease in the Intensive Treatment Group**  
 83 **Compared with Standard Treatment Group when Adjusting for Time-Updated Myocardial**  
 84 **Infarction and Congestive Heart Failure**

| <b>Time-updated variable (n of events post-intervention)</b> | <b>Adjusted Hazard Ratio (95% CI)</b> | <b>P value</b> |
|--------------------------------------------------------------|---------------------------------------|----------------|
| <b>Myocardial infarction (33)*</b>                           | 0.74 (0.56-0.98)                      | 0.04           |
| <b>Congestive heart failure (53)*</b>                        | 0.74 (0.56-0.98)                      | 0.04           |

85 \*None of these events occurred before a left-ventricular conduction disease diagnosis.  
 86 Models were adjusted for age, sex, race, clinical or subclinical cardiovascular disease, prevalent  
 87 congestive heart failure, and chronic kidney disease.

88

89 **eTable 5. Competing Risk Regression with All-Cause Death as a Competing Risk**

| <b>Outcome</b>                             | <b>Number of events</b> | <b>Model</b> | <b>Subdistribution hazard ratio (95% CI)</b> | <b>P value</b> |
|--------------------------------------------|-------------------------|--------------|----------------------------------------------|----------------|
| <b>Left-ventricular conduction disease</b> | 203                     | Unadjusted   | 0.76 (0.57-0.99)                             | 0.048          |
|                                            |                         | Adjusted     | 0.75 (0.56-0.99)                             | 0.042          |
| <b>Right bundle branch block</b>           | 184                     | Unadjusted   | 0.96 (0.72-1.29)                             | 0.80           |
|                                            |                         | Adjusted     | 0.96 (0.72-1.28)                             | 0.79           |

90 Risk of incident left-ventricular conduction disease and right bundle branch block when considering  
 91 all-cause death as a competing risk.

92 Number of all-cause deaths, n = 211.

93 Adjusted models included age, sex, race, clinical or subclinical cardiovascular disease, congestive  
 94 heart failure, and chronic kidney disease.

95



96 **eTable 6. Baseline Characteristics Associated with Incident Left Ventricular Conduction**  
 97 **Disease in Unadjusted Models.**

| Characteristic                                        | Hazard ratio (95% CI) | P-value |
|-------------------------------------------------------|-----------------------|---------|
| <b>Intensive BP control</b>                           | 0.75 (0.57-0.99)      | 0.046   |
| <b>Age<sup>a</sup></b>                                | 1.47 (1.26-1.70)      | <0.001  |
| <b>Male sex</b>                                       | 2.33 (1.65-3.29)      | <0.001  |
| <b>Race</b>                                           |                       |         |
| White                                                 | Reference             |         |
| Non-white                                             | 0.63 (0.46-0.86)      | 0.004   |
| <b>Ethnicity</b>                                      |                       |         |
| Hispanic                                              | Reference             |         |
| Non-Hispanic                                          | 0.93 (0.61-1.42)      | 0.73    |
| <b>Body mass index<sup>b</sup></b>                    | 1.18 (0.88-1.59)      | 0.27    |
| <b>Smoking</b>                                        |                       |         |
| Never                                                 | Reference             |         |
| Ever smoked                                           | 1.25 (0.96-1.63)      | 0.10    |
| <b>Vigorous activity</b>                              |                       |         |
| None                                                  | Reference             |         |
| 1-3 times/month                                       | 0.72 (0.45-1.13)      | 0.16    |
| 1 time/month                                          | 0.68 (0.39-1.17)      | 0.16    |
| 2-4 times/week                                        | 1.10 (0.73-1.45)      | 0.86    |
| >5 times/week                                         | 0.80 (0.50-1.29)      | 0.36    |
| <b>Aspirin use</b>                                    | 1.16 (0.88-1.53)      | 0.29    |
| <b>Clinical or subclinical cardiovascular disease</b> | 1.81 (1.33-2.46)      | <0.001  |
| <b>Atrial fibrillation</b>                            | 2.12 (0.87-5.16)      | 0.10    |
| <b>Congestive heart failure</b>                       | 2.03 (1.13-3.64)      | 0.017   |
| <b>Chronic kidney failure</b>                         | 1.38 (1.03-1.85)      | 0.029   |

98 <sup>a</sup> Interpreted as a hazard for every 10-year increase

99 <sup>b</sup> Interpreted as a hazard for every 10 kg/m<sup>2</sup> increase

100

101 **Figure legends:**

102 **eFigure 1. CONSORT Flow Diagram**

103 Inclusions and exclusions of the participants in the present study.

104 **ECG:** electrocardiogram, **SPRINT:** Systolic Blood Pressure Intervention Trial.

105

106 **eFigure 2. Interaction Analyses**

107 Interactions between randomization assignment, listed covariates, and the risk of incident left-  
108 ventricular conduction disease. The models were adjusted for age, sex, race, clinical or subclinical  
109 cardiovascular disease, congestive heart failure, and chronic kidney disease.

110 <sup>a</sup> Age is stratified by the mean age in study cohort.

111 Circles represent hazard ratios and error bars denote 95% confidence intervals.

112 **CVD:** Cardiovascular disease (see text for criteria)

113

114 **eFigure 3. Blood Pressure Control Group and Baseline Characteristics Associated with**  
115 **Incident Left-Ventricular Conduction Disease After Multivariable Adjustment**

116 Baseline characteristics associated with incident left-ventricular conduction disease. Multivariable  
117 adjustment included treatment group, age, sex, race, clinical or subclinical cardiovascular disease,  
118 congestive heart failure, and chronic kidney disease.

119 <sup>a</sup> Interpreted as a hazard for every 10-year increase

120 <sup>b</sup> Interpreted as a hazard for every 10 kg/m<sup>2</sup>-increase

121 Blue circles represent hazard ratios and error bars denote 95% confidence intervals.

122

123 **CVD:** Cardiovascular disease

124

125

126 **eFigure 1. CONSORT Flow Diagram**

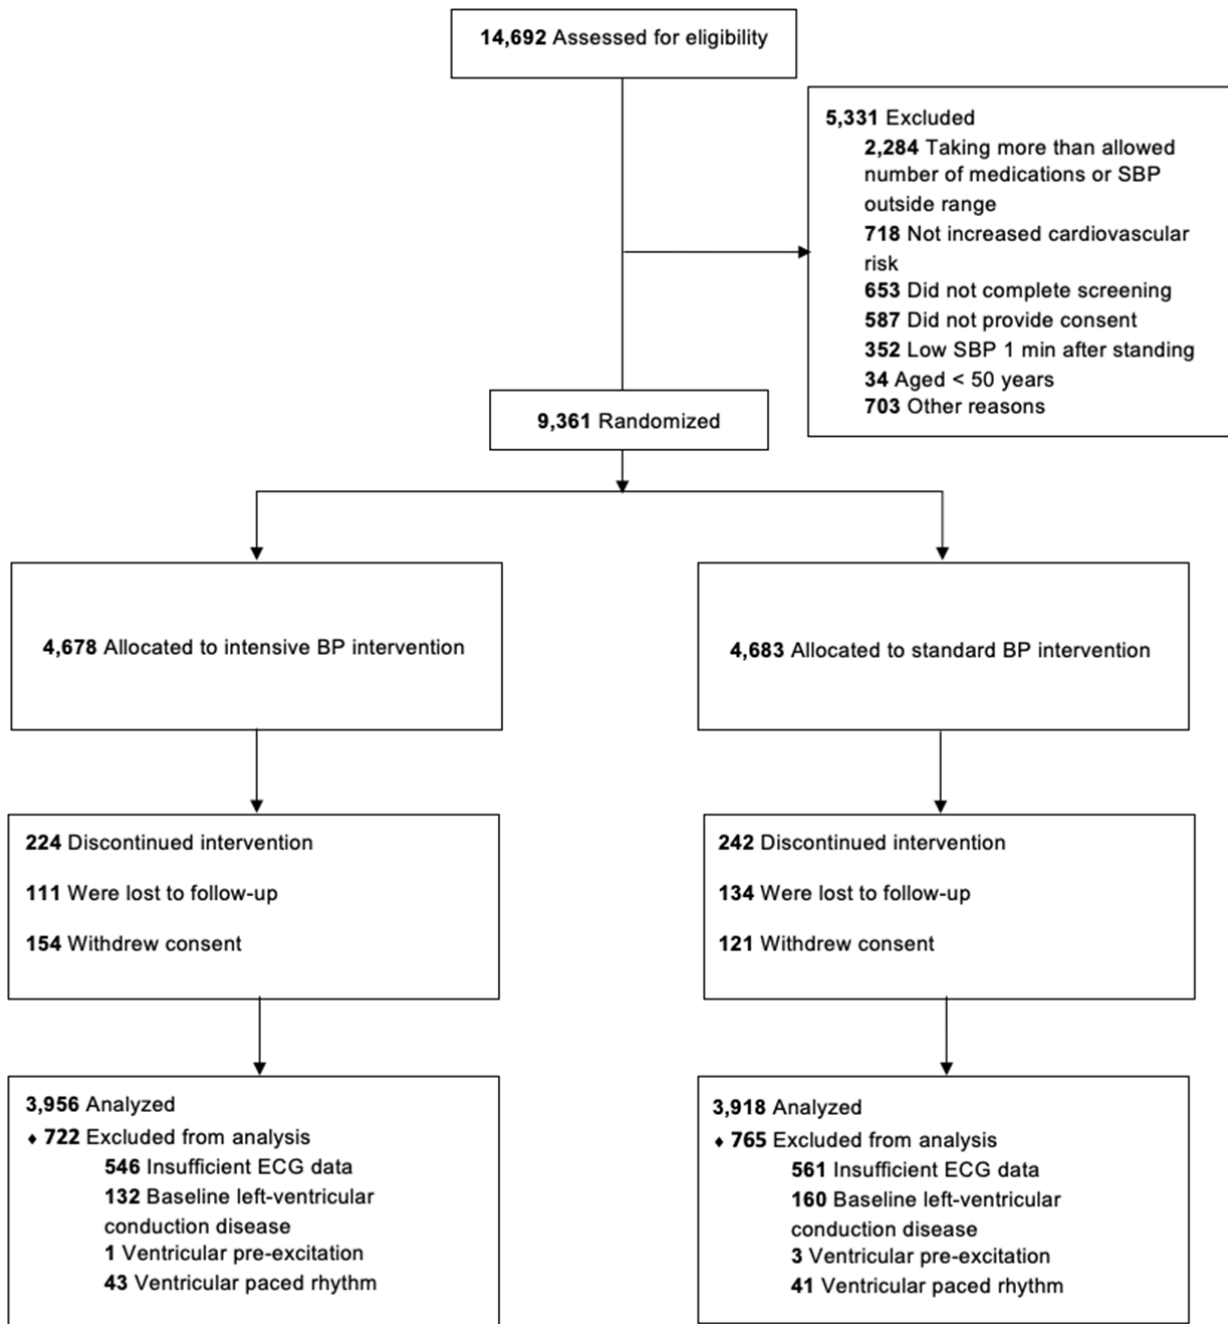

127

128 Inclusions and exclusions of the participants in the present study.

129 **BP:** blood pressure, **ECG:** electrocardiogram

130 **eFigure 2. Interaction Analyses**

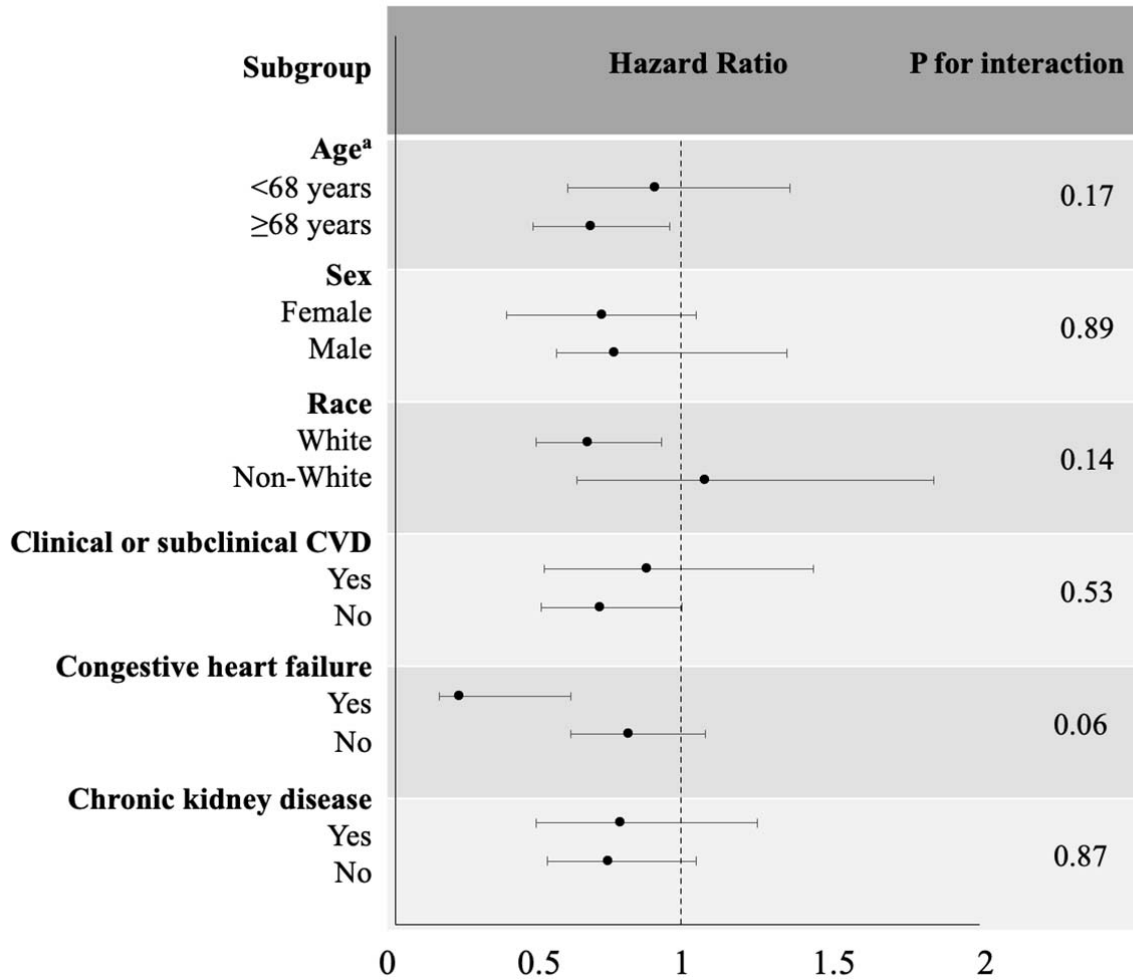

131

132

133 Interactions between randomization assignment, listed covariates, and the risk of incident left-  
 134 ventricular conduction disease. The models were adjusted for age, sex, race, clinical or subclinical  
 135 cardiovascular disease, congestive heart failure, and chronic kidney disease.

136 <sup>a</sup> Age is stratified by the mean age in study cohort.

137 Circles represent hazard ratios and error bars denote 95% confidence intervals.

138 **CVD:** Cardiovascular disease (see text for criteria).

139

140 **eFigure 3. Blood Pressure Control Group and Baseline Characteristics Associated with**  
 141 **Incident Left-Ventricular Conduction Disease After Multivariable Adjustment**

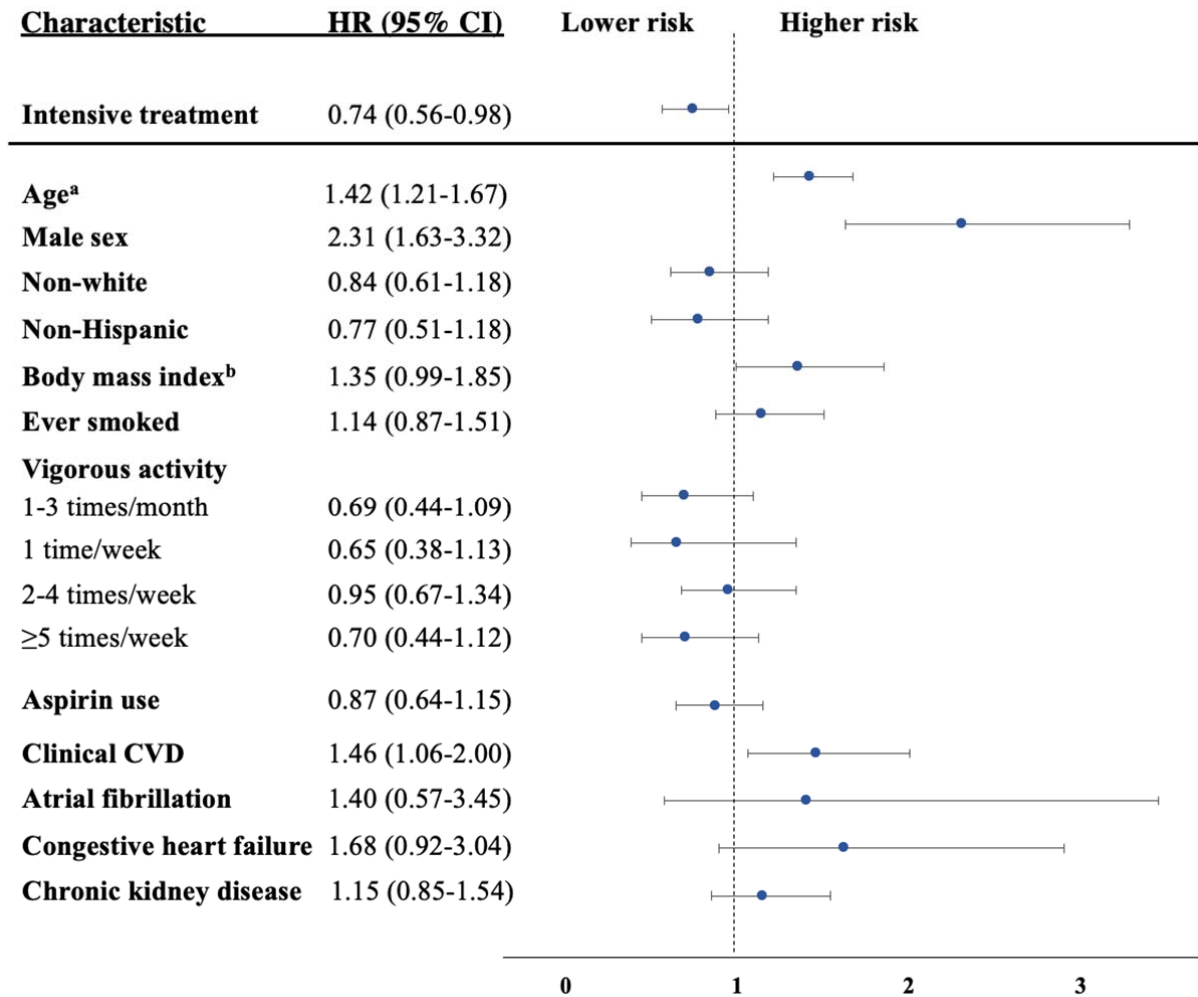

142

143

144 Baseline characteristics associated with incident left-ventricular conduction disease. Multivariable  
 145 adjustment included treatment group, age, sex, race, clinical or subclinical cardiovascular disease,  
 146 congestive heart failure, and chronic kidney disease.

147 <sup>a</sup> Interpreted as a hazard for every 10-year increase

148 <sup>b</sup> Interpreted as a hazard for every 10 kg/m<sup>2</sup>-increase

149 Blue circles represent hazard ratios and error bars denote 95% confidence intervals.

150

151 **CVD:** Cardiovascular disease

152

153
