# Supplementary material
Source: PubMed Central journal article supplement (PMC10157506)
Supplement: jamacardiol-e230845-s003.pdf [file jamacardiol-e230845-s003.pdf]

## Data Sharing Statement

Frimodt-Møller. Association Between Intensive vs Standard Blood Pressure Control and Incident Left Ventricular Conduction Disease. *JAMA Cardiol.* Published May 03, 2023.  
doi:10.1001/jamacardio.2023.0845

### Data

**Data available:** No
